# Supplementary material
Source: PubMed Central journal article supplement (PMC2572913)
Supplement: 0805208105_0805208105SI.pdf [file 0805208105_0805208105SI.pdf]

# Supporting Information

Cadoret *et al.* 10.1073/pnas.0805208105

## Methods

**Bioinformatic Analyses.** For the analysis of conservation patterns in replication origins and in promoters, we retrieved 2991 transcripts corresponding to the set of 443 annotated known genes from the University of California, Santa Cruz (UCSC) ENCODE Website. The position of transcription start sites (TSS) was defined as the 5' end of those transcripts, and promoter regions were defined as the 1500 bp upstream of the TSS. Overlapping regions were grouped together. The final set includes 1035 promoter regions, with an average length of 1997 bp. Conserved regions (CRs) were retrieved from the UCSC ENCODE Website. These CRs correspond to the consensus of 3 methods and 3 different alignments from 28 different vertebrate species [Margulies EH, *et al.* (2007) Analyses of deep mammalian sequence alignments and constraint predictions for 1% of the human genome. *Genome Res* 17(6):760–774]. We choose the moderate set, which provides CRs covering about 5% of the ENCODE regions [Margulies EH, *et al.* (2007) Analyses of deep mammalian sequence alignments and constraint predictions for 1% of the human genome. *Genome Res* 17(6):760–774]. The conservation of sequences of interest (origins or promoters) was investigated by measuring the frequency of those regions that overlap with CRs. We tested the significance of the overlap by using a bootstrap of 1000 replicates of the same length of the origins or promoters randomly picked in the same ENCODE region

**Amplification of SNS.** First, we polydT tailed the 3' end of SNS with terminal transferase (New England Biolabs) as described by Liu, *et al.* Then, for second-strand synthesis and incorporation of the T7 promoter sequence, the tailing reaction product (20  $\mu$ l) was mixed with 1  $\mu$ l 0.15  $\mu$ M T7-A18B primer, 2.7  $\mu$ l 10X NEB-2 buffer, and 1  $\mu$ l 10 mM dNTPs (New England Biolabs). Samples were incubated at 94°C for 2 min, were ramped down at  $-1$  C°/sec to 25°C, were held while T4 DNA polymerase (New England Biolabs) was added to a final concentration of 0.22 U/ $\mu$ l, and the volume was made up to 27  $\mu$ l with H<sub>2</sub>O. The sample was incubated at 37°C for 30 min, and the reaction was stopped by the addition of 5  $\mu$ l 0.5 M EDTA pH 8.0. Samples were purified with the MinElute Reaction Cleanup Kit (Qiagen), increasing the elution volume to 20  $\mu$ l. Finally, the MegaScript Kit (Ambion) was used for *in vitro* transcription of a concentrated 8- $\mu$ l sample as described in Liu, *et al.*, except that the NTP pool was optimized for RNA labeling. Two  $\mu$ l of a mix consisting of 100 mM ATP, CTP, and GTP, 2  $\mu$ l 50 mM aminoallyl-UTP (Fermentas) and 1  $\mu$ l UTP 100 mM were added. The product was purified with the RNeasy Minikit (Qiagen), and RNA was quantified by Nanodrop and analyzed by BioAnalyser with Lab-on-a-chip total RNA nano biosizing assay (Agilent Technologies).







**A**

| Chromosome | ENCODE begin | ENCODE end | N-domain border | Closest exp origin | Distance |
|------------|--------------|------------|-----------------|--------------------|----------|
| chr7       | 89428339     | 90542763   | 89871000        | 89871631           | 631      |
| chr7       | 115404471    | 117281897  | 115429000       | 115728548          | 299548   |
| chr8       | 118882220    | 119382220  | 119195000       | 119250180          | 55180    |
| chr11      | 63940888     | 64440888   | 64269000        | 64251467           | 17533    |
| chr18      | 23719231     | 24219231   | 24011000        | 24011725           | 725      |
| chr21      | 32668236     | 34364221   | 33066000        | 33143912           | 77912    |
| chr21      | 32668236     | 34364221   | 33525000        | 33446859           | 78141    |

**B**

| Chromosome | ENCODE begin | ENCODE end | N-domain begin | N-domain end | Nb. origins |
|------------|--------------|------------|----------------|--------------|-------------|
| chr2       | 234273824    | 234773888  | 234060000      | 235644000    | 5           |
| chr7       | 113527083    | 114527083  | 113331000      | 115429000    | 4           |
| chr7       | 125672606    | 126835803  | 124166000      | 126880000    | 7           |
| chr14      | 52947075     | 53447075   | 52702000       | 54042000     | 1           |
| chr16      | 25780427     | 26280428   | 24943000       | 27477000     | 0           |

**Fig. S4.** Intersection between ENCODE regions and N-domains of replication computationally identified [Huvet M, *et al.* (2007) Human gene organization driven by the coordination of replication and transcription. *Genome Res* 17(9):1278–1285]. (A) Experimental validation of 2 computationally predicted origins. Six ENCODE regions contain 7 N-domain borders (i.e., putative replication origins). Positions of ENCODE regions borders, N-domain borders, closest experimental origin, and distance between each putative origin and its closest experimental origin are shown. Two of 7 are located less than 1 kb from our experimentally validated origin. We tested the significance of this overlap by using a bootstrap of 1000 replicates, of the same length of the origins, picked randomly in the same ENCODE region. The probability that 2 computationally predicted origins fall by chance less than 1 kb from an experimentally characterized origin is only  $10^{-4}$ . (B) ENCODE regions included in N-domains contain 0 to 7 origins. Positions of ENCODE regions borders, N-domain borders, and number of origins found experimentally are shown.

**Table S1. Origin segments**

| ENCODE region | Chromosome | Beginning | End       | Origin class |
|---------------|------------|-----------|-----------|--------------|
| ENr231        | chr1       | 147984909 | 147986846 |              |
|               | chr1       | 148244302 | 148246331 |              |
|               | chr1       | 148258507 | 148260234 |              |
|               | chr1       | 148296747 | 148298101 |              |
|               | chr1       | 148360133 | 148361364 |              |
| ENr112        | chr2       | 51943931  | 51945315  | Isolated     |
| ENr121        | chr2       | 118505924 | 118507071 |              |
| ENr331        | chr2       | 220107251 | 220108794 |              |
|               | chr2       | 220135657 | 220137337 |              |
|               | chr2       | 220165844 | 220168917 |              |
|               | chr2       | 220174966 | 220176411 |              |
|               | chr2       | 220188829 | 220191429 |              |
|               | chr2       | 220198477 | 220200657 | Highly dense |
|               | chr2       | 220201886 | 220203102 |              |
|               | chr2       | 220228419 | 220230263 |              |
|               | chr2       | 220242014 | 220245496 |              |
|               | chr2       | 220250475 | 220251903 | Highly dense |
|               | chr2       | 220261756 | 220263177 |              |
|               | chr2       | 220336089 | 220337258 |              |
|               | chr2       | 220338833 | 220340250 |              |
|               | chr2       | 220541427 | 220543128 |              |
|               | ENr131     | chr2      | 234486579 | 234487948    |
| chr2          |            | 234656507 | 234657628 |              |
| chr2          |            | 234666547 | 234667905 | Highly dense |
| chr2          |            | 234671440 | 234672777 |              |
| ENr221        | chr2       | 234740455 | 234741601 |              |
|               | chr5       | 55873281  | 55874378  |              |
|               | chr5       | 55981348  | 55982831  | Isolated     |
|               | chr5       | 56085418  | 56086517  |              |
|               | chr5       | 56088066  | 56089478  |              |
|               | chr5       | 56119168  | 56120680  |              |
| ENm002        | chr5       | 56147525  | 56149060  |              |
|               | chr5       | 56241199  | 56242625  |              |
|               | chr5       | 131571851 | 131573644 |              |
|               | chr5       | 131620957 | 131622317 |              |
|               | chr5       | 131636239 | 131637448 |              |
|               | chr5       | 131744261 | 131745522 |              |
|               | chr5       | 131801134 | 131802891 |              |
|               | chr5       | 131860038 | 131861573 |              |
|               | chr5       | 132025755 | 132026955 |              |
|               | chr5       | 132048184 | 132049426 |              |
|               | chr5       | 132151529 | 132152659 |              |
| ENr212        | chr5       | 132248525 | 132250628 |              |
|               | chr5       | 141950090 | 141951462 |              |
|               | chr5       | 141999954 | 142001505 |              |
|               | chr5       | 142078249 | 142081176 |              |
|               | chr5       | 142176213 | 142178174 |              |
|               | chr5       | 142199652 | 142201376 |              |
|               | chr5       | 142236258 | 142237249 |              |
|               | chr5       | 142259552 | 142261293 |              |
| ENr334        | chr5       | 142361833 | 142363780 |              |
|               | chr6       | 41518826  | 41520409  |              |
|               | chr6       | 41543060  | 41544342  |              |
|               | chr6       | 41544942  | 41546022  |              |
|               | chr6       | 41578447  | 41579719  |              |
|               | chr6       | 41585098  | 41586734  |              |
|               | chr6       | 41599804  | 41601172  |              |
|               | chr6       | 41622513  | 41624061  |              |
|               | chr6       | 41654120  | 41655750  |              |

continued

Table S1. Continued

| ENCODE region | Chromosome | Beginning | End       | Origin class<br>XXXXXXX |
|---------------|------------|-----------|-----------|-------------------------|
|               | chr6       | 41719178  | 41720147  |                         |
|               | chr6       | 41854596  | 41855697  |                         |
|               | chr6       | 41856075  | 41857739  |                         |
| ENr223        | chr6       | 74011080  | 74012121  |                         |
|               | chr6       | 74108528  | 74110397  |                         |
|               | chr6       | 74160713  | 74161992  |                         |
|               | chr6       | 74287525  | 74288636  |                         |
| ENr323        | chr6       | 108385466 | 108386797 |                         |
|               | chr6       | 108547474 | 108548773 |                         |
|               | chr6       | 108552017 | 108553295 |                         |
|               | chr6       | 108711089 | 108712249 | Isolated                |
| ENr222        | chr6       | 132399844 | 132401367 | Isolated                |
| ENm010        | chr7       | 26920770  | 26922694  |                         |
|               | chr7       | 26922861  | 26924734  | Highly dense            |
|               | chr7       | 26926630  | 26928154  |                         |
|               | chr7       | 26941783  | 26943229  |                         |
|               | chr7       | 26943851  | 26945045  | Highly dense            |
|               | chr7       | 26952545  | 26954275  |                         |
|               | chr7       | 26967119  | 26968225  |                         |
|               | chr7       | 26982812  | 26983987  |                         |
|               | chr7       | 27028731  | 27030030  |                         |
|               | chr7       | 27032062  | 27033765  |                         |
|               | chr7       | 27047481  | 27048910  |                         |
|               | chr7       | 27056729  | 27057891  |                         |
| ENm013        | chr7       | 89478648  | 89479835  |                         |
|               | chr7       | 89519250  | 89520459  |                         |
|               | chr7       | 89523106  | 89525040  |                         |
|               | chr7       | 89677540  | 89679141  | Isolated                |
|               | chr7       | 89870257  | 89871631  | Isolated                |
|               | chr7       | 90037675  | 90039130  |                         |
|               | chr7       | 90089748  | 90091313  |                         |
|               | chr7       | 90240841  | 90242057  | Isolated                |
| ENm012        | chr7       | 113873919 | 113875052 | Isolated                |
|               | chr7       | 114116473 | 114118176 | Isolated                |
|               | chr7       | 114318566 | 114319629 |                         |
|               | chr7       | 114351397 | 114352460 |                         |
| ENm001        | chr7       | 115728548 | 115730087 |                         |
|               | chr7       | 115733502 | 115735495 | Highly dense            |
|               | chr7       | 115739541 | 115741149 |                         |
|               | chr7       | 115758143 | 115759653 |                         |
|               | chr7       | 115760088 | 115761361 |                         |
|               | chr7       | 115792540 | 115794616 |                         |
|               | chr7       | 115932781 | 115934827 |                         |
|               | chr7       | 116029862 | 116032737 |                         |
|               | chr7       | 116096721 | 116098030 |                         |
|               | chr7       | 116187758 | 116189117 |                         |
|               | chr7       | 116301540 | 116302519 |                         |
|               | chr7       | 116398408 | 116400119 |                         |
|               | chr7       | 116413422 | 116414684 |                         |
|               | chr7       | 116425234 | 116426588 |                         |
|               | chr7       | 116556983 | 116558225 | Isolated                |
|               | chr7       | 116713437 | 116715501 |                         |
|               | chr7       | 116720877 | 116722362 |                         |
|               | chr7       | 116799265 | 116800441 |                         |
|               | chr7       | 117025196 | 117026369 | Isolated                |
| ENm014        | chr7       | 126079638 | 126080850 |                         |
|               | chr7       | 126112892 | 126113549 |                         |
|               | chr7       | 126247472 | 126248824 | Isolated                |
|               | chr7       | 126581134 | 126582490 |                         |
|               | chr7       | 126626567 | 126628059 |                         |

continued

Table S1. Continued

| ENCODE region | Chromosome | Beginning | End      | Origin class |
|---------------|------------|-----------|----------|--------------|
| ENr322        | chr14      | 98486278  | 98487757 | Highly dense |
|               | chr14      | 98696258  | 98697981 |              |
|               | chr14      | 98724314  | 98725645 |              |
|               | chr14      | 98767316  | 98769158 |              |
|               | chr14      | 98771506  | 98772663 |              |
|               | chr14      | 98782269  | 98783573 |              |
|               | chr14      | 98808316  | 98809543 |              |
|               | chr14      | 98881859  | 98883202 |              |
|               | chr14      | 98956703  | 98958083 |              |
|               | ENr233     | chr15     | 41735285 |              |
| chr15         |            | 41850700  | 41852158 |              |
| chr15         |            | 42013413  | 42014920 |              |
| ENm008        | chr16      | 47415     | 48530    |              |
|               | chr16      | 128359    | 129221   |              |
|               | chr16      | 144166    | 145603   |              |
|               | chr16      | 154879    | 156172   |              |
|               | chr16      | 176977    | 177951   |              |
|               | chr16      | 265752    | 267214   |              |
|               | chr16      | 271684    | 272766   |              |
|               | chr16      | 343083    | 344285   |              |
|               | chr16      | 353862    | 355393   |              |
|               | chr16      | 371926    | 373475   |              |
|               | chr16      | 391235    | 392389   |              |
|               | chr16      | 458042    | 459289   |              |
|               | ENr313     | chr16     | 60988052 |              |
| ENr213        | chr18      | 24011725  | 24012891 |              |
| ENm007        | chr18      | 24064501  | 24065770 |              |
|               | chr19      | 59062973  | 59064186 |              |
|               | chr19      | 59065358  | 59067169 |              |
|               | chr19      | 59077897  | 59080362 |              |
|               | chr19      | 59093470  | 59095647 |              |
|               | chr19      | 59104275  | 59106633 |              |
|               | chr19      | 59138068  | 59139337 |              |
|               | chr19      | 59155330  | 59157173 |              |
|               | chr19      | 59174913  | 59178718 |              |
|               | chr19      | 59186590  | 59187790 |              |
|               | chr19      | 59206956  | 59208156 |              |
|               | chr19      | 59225201  | 59226338 |              |
|               | chr19      | 59340003  | 59341368 |              |
|               | chr19      | 59357776  | 59359107 |              |
|               | chr19      | 59385445  | 59387234 |              |
|               | chr19      | 59588883  | 59590167 |              |
|               | chr19      | 59633614  | 59634656 |              |
|               | ENr333     | chr20     | 33449379 |              |
| chr20         |            | 33520581  | 33521619 |              |
| chr20         |            | 33593121  | 33594722 |              |
| chr20         |            | 33604647  | 33606279 |              |
| chr20         |            | 33652973  | 33654116 |              |
| chr20         |            | 33667226  | 33668962 |              |
| chr20         |            | 33763526  | 33764778 |              |
| chr20         |            | 33764778  | 33764778 |              |
| ENm005        | chr21      | 32736476  | 32738137 |              |
|               | chr21      | 32825833  | 32827210 |              |
|               | chr21      | 32924855  | 32926140 |              |
|               | chr21      | 33143912  | 33145612 |              |
|               | chr21      | 33314649  | 33316910 |              |
|               | chr21      | 33321658  | 33323457 |              |
|               | chr21      | 33371196  | 33372523 |              |
|               | chr21      | 33445752  | 33446859 |              |
|               | chr21      | 33697620  | 33699322 |              |
|               | chr21      | 33773906  | 33775426 |              |
|               | chr21      | 33847294  | 33849173 |              |
|               | chr21      | 33869514  | 33870830 |              |
|               | chr21      | 33937141  | 33938736 |              |

continued



Table S1. Continued

| ENCODE region | Chromosome | Beginning | End       | Origin class |
|---------------|------------|-----------|-----------|--------------|
| ENr133        | chr21      | 39299170  | 39300343  |              |
|               | chr21      | 39377239  | 39378501  |              |
|               | chr21      | 39607655  | 39608789  | Isolated     |
| ENm004        | chr22      | 30314293  | 30315055  |              |
|               | chr22      | 30336429  | 30337386  |              |
|               | chr22      | 30349689  | 30350809  |              |
|               | chr22      | 30802515  | 30804264  |              |
|               | chr22      | 30843605  | 30844819  |              |
|               | chr22      | 30896070  | 30897269  |              |
|               | chr22      | 31030409  | 31031414  | Isolated     |
|               | chr22      | 31156785  | 31158209  |              |
|               | chr22      | 31195329  | 31197371  |              |
|               | chr22      | 31366116  | 31367680  |              |
|               | chr22      | 31437500  | 31439348  |              |
|               | chr22      | 31530713  | 31531675  |              |
|               | chr22      | 31545005  | 31546201  |              |
| ENr324        | chrX       | 122559999 | 122561372 |              |
|               | chrX       | 122590866 | 122592123 |              |
|               | chrX       | 122624067 | 122625387 |              |
|               | chrX       | 122660854 | 122662000 |              |
|               | chrX       | 122719627 | 122720715 |              |
|               | chrX       | 122820974 | 122822324 | Isolated     |
|               | chrX       | 122959521 | 122961890 |              |
| ENm006        | chrX       | 152662042 | 152663313 |              |
|               | chrX       | 152689689 | 152691828 |              |
|               | chrX       | 152704242 | 152705388 |              |
|               | chrX       | 152721163 | 152722370 |              |
|               | chrX       | 152757248 | 152758442 |              |
|               | chrX       | 152816486 | 152818401 |              |
|               | chrX       | 152883775 | 152885328 |              |
|               | chrX       | 153070355 | 153071501 |              |
|               | chrX       | 153081356 | 153082612 |              |
|               | chrX       | 153123710 | 153124807 |              |
|               | chrX       | 153130060 | 153131533 |              |
|               | chrX       | 153181711 | 153184284 |              |
|               | chrX       | 153236591 | 153237728 |              |
|               | chrX       | 153249941 | 153251354 |              |
|               | chrX       | 153327230 | 153328684 |              |
|               | chrX       | 153338595 | 153339968 | OriG6PD      |
|               | chrX       | 153818861 | 153819900 | Isolated     |

**Table S2. Short ssDNA segments obtained with stringent criteria**

| Chromosome | Beginning | End       |
|------------|-----------|-----------|
| Chr1       | 148302434 | 148303315 |
| Chr11      | 4730926   | 4731822   |
| Chr11      | 63994433  | 63995679  |
| Chr14      | 98908400  | 98909476  |
| Chr2       | 234629711 | 234630595 |
| Chr21      | 34015696  | 34017159  |
| Chr5       | 56295243  | 56296211  |
| Chr7       | 113942120 | 113943850 |
| Chr8       | 119342198 | 119343366 |

Table S3. Short ssDNA segments obtained with less stringent criteria

| Chromosome | Beginning | End       |
|------------|-----------|-----------|
| Chr1       | 147994346 | 147995114 |
| Chr1       | 148045616 | 148046395 |
| Chr1       | 148089197 | 148090135 |
| Chr1       | 148135326 | 148136324 |
| Chr1       | 148140049 | 148140794 |
| Chr1       | 148142404 | 148143288 |
| Chr1       | 148281719 | 148282862 |
| Chr1       | 148289583 | 148291287 |
| Chr1       | 148302434 | 148303315 |
| Chr1       | 148330817 | 148332181 |
| Chr1       | 148389782 | 148391035 |
| Chr10      | 55227638  | 55228527  |
| Chr10      | 55459529  | 55460848  |
| Chr11      | 2093511   | 2094406   |
| Chr11      | 2167384   | 2168284   |
| Chr11      | 2191849   | 2192739   |
| Chr11      | 2298623   | 2299539   |
| Chr11      | 4730926   | 4732277   |
| Chr11      | 5133531   | 5134393   |
| Chr11      | 5313319   | 5314209   |
| Chr11      | 5595938   | 5596841   |
| Chr11      | 5680414   | 5681160   |
| Chr11      | 5687697   | 5689222   |
| Chr11      | 63990114  | 63990772  |
| Chr11      | 63994206  | 63995679  |
| Chr11      | 64021389  | 64022128  |
| Chr11      | 64102109  | 64103140  |
| Chr11      | 64189138  | 64190272  |
| Chr11      | 64273426  | 64274383  |
| Chr11      | 64391691  | 64392701  |
| Chr11      | 116157738 | 116158738 |
| Chr12      | 38626913  | 38627983  |
| Chr12      | 38909853  | 38911145  |
| Chr13      | 29568800  | 29569735  |
| Chr13      | 112488810 | 112489461 |
| Chr13      | 112606624 | 112607524 |
| Chr13      | 112808792 | 112809833 |
| Chr14      | 53151432  | 53152397  |
| Chr14      | 53231677  | 53233208  |
| Chr14      | 53349472  | 53351117  |
| Chr14      | 98848330  | 98849434  |
| Chr14      | 98906288  | 98907151  |
| Chr14      | 98908400  | 98909476  |
| Chr15      | 41546187  | 41547066  |
| Chr15      | 41705071  | 41705723  |
| Chr15      | 41711222  | 41711881  |
| Chr15      | 41716599  | 41717383  |
| Chr15      | 41727851  | 41728706  |
| Chr15      | 41835861  | 41836733  |
| Chr15      | 41947175  | 41948454  |
| Chr16      | 37951     | 38703     |
| Chr16      | 153019    | 153663    |
| Chr16      | 222700    | 223746    |
| Chr16      | 239942    | 240852    |
| Chr16      | 350344    | 351446    |
| Chr16      | 403327    | 404203    |
| Chr16      | 422121    | 422871    |
| Chr16      | 25980622  | 25981932  |
| Chr16      | 26075229  | 26076594  |
| Chr16      | 61111353  | 61112457  |
| Chr18      | 24039017  | 24040002  |
| Chr18      | 59497731  | 59498624  |

continued

Table S3. Continued

| Chromosome | Beginning | End       |
|------------|-----------|-----------|
| Chr19      | 59083008  | 59083928  |
| Chr19      | 59207244  | 59208156  |
| Chr19      | 59276176  | 59277045  |
| Chr19      | 59392364  | 59393406  |
| Chr19      | 59439949  | 59440608  |
| Chr19      | 59483497  | 59484141  |
| Chr19      | 59503354  | 59504013  |
| Chr19      | 59572518  | 59573340  |
| Chr19      | 59613466  | 59614421  |
| Chr19      | 59666309  | 59667473  |
| Chr19      | 59759818  | 59761248  |
| Chr19      | 59852668  | 59854113  |
| Chr19      | 59879347  | 59880087  |
| Chr2       | 51690973  | 51692246  |
| Chr2       | 51906020  | 51907160  |
| Chr2       | 51925613  | 51926744  |
| Chr2       | 118106655 | 118107792 |
| Chr2       | 118245142 | 118246802 |
| Chr2       | 118388678 | 118389547 |
| Chr2       | 220518360 | 220519278 |
| Chr2       | 234384126 | 234385388 |
| Chr2       | 234481585 | 234482489 |
| Chr2       | 234575429 | 234576374 |
| Chr2       | 234630670 | 234631327 |
| Chr2       | 234667846 | 234669209 |
| Chr2       | 234698012 | 234699267 |
| Chr20      | 33406227  | 33407354  |
| Chr20      | 33420723  | 33421839  |
| Chr21      | 32768862  | 32770011  |
| Chr21      | 32850099  | 32850751  |
| Chr21      | 32886148  | 32887036  |
| Chr21      | 32917818  | 32918949  |
| Chr21      | 33059062  | 33060306  |
| Chr21      | 33539418  | 33540507  |
| Chr21      | 33560645  | 33561527  |
| Chr21      | 33629320  | 33630285  |
| Chr21      | 33704941  | 33705870  |
| Chr21      | 33779372  | 33780125  |
| Chr21      | 33782613  | 33783974  |
| Chr21      | 33866109  | 33867218  |
| Chr21      | 34015696  | 34017159  |
| Chr21      | 34323487  | 34324414  |
| Chr21      | 39664436  | 39665180  |
| Chr21      | 39734404  | 39735264  |
| Chr22      | 30163672  | 30164633  |
| Chr22      | 30231331  | 30232276  |
| Chr22      | 30289137  | 30289796  |
| Chr22      | 30291389  | 30292112  |
| Chr22      | 30360511  | 30361402  |
| Chr22      | 30425554  | 30426213  |
| Chr22      | 30486758  | 30487763  |
| Chr22      | 30509856  | 30510798  |
| Chr22      | 30634326  | 30635177  |
| Chr22      | 30788719  | 30789626  |
| Chr22      | 31047522  | 31048424  |
| Chr22      | 31250037  | 31251055  |
| Chr22      | 31293476  | 31294587  |
| Chr22      | 31357188  | 31358002  |
| Chr22      | 31609686  | 31610563  |
| Chr4       | 118641431 | 118642304 |
| Chr4       | 119048139 | 119049046 |
| Chr5       | 55965960  | 55967436  |
| Chr5       | 56161424  | 56162939  |

continued





Table S4. Continued

| Gene name                      | Forward primer sequence validation origins | Reverse primer sequence  | Amplicon position           |
|--------------------------------|--------------------------------------------|--------------------------|-----------------------------|
| background1                    | AGGGCTGAGCCATAATTCTTCT                     | CTGCAATGCACTCACAACAAC    | chr2:51629857 + 51630010    |
| background2                    | GGCAAGGGAAGGGGTAAC                         | ATTCCCACTCATTGCTCAGG     | chr4:118920576 + 118920719  |
| background3                    | CACTGTCAAAGTCTGTGAAGCTATT                  | AGGCCAAACGTTTTTCTTTG     | chr6:132581326 + 132581470  |
| background4                    | TAGGCGCAGCTTGTAGGACT                       | CAGGATTTGGGACAACCTGG     | chr11:4898934 + 4899089     |
| background5                    | CTTGACAATGCCTCACTCA                        | GAAAACACCAGCCACCAGAA     | chr7:89922194 + 89922313    |
| background6                    | GATGCTGAGGGGTTTCAAA                        | TGCAAGCCACTTTCGGTTAG     | chr7:116505991 + 116506123  |
| background7                    | TGACATACAACCAACCAGAAC                      | GGAATGAGATGGACAGCAAATC   | chr7:26880046 + 26880177    |
| background8                    | CTTTGAAGGAAATCCCAGTTGTC                    | CCGGCTTCCCCTGTAGTTATT    | chr7:27109288 + 27109393    |
| Highly dense origins           |                                            |                          |                             |
| T1                             | GGCTTGGAGTTTCAACAGGA                       | CGCAGGTACGAGTCAACAAC     | chr7:115734636 + 115734791  |
| T2                             | GGTGTAGATTGGGGTTTTGT                       | TGTCCCAGTTGTCCAGTC       | chr2:234664712 + 234664826  |
| T3                             | CAGTGAATGGGATGCTCTG                        | CTGTCTCCCTGTGGGTGAG      | chr7:26927452 + 26927569    |
| T4                             | CCTGCCCTTGGTAGGTCTC                        | CAGCTCATCTGGCAACACAG     | chr2:220197823 + 220197951  |
| T5                             | TGGTTGGCTGGCTACTCT                         | CGCGTCTACTCTGATGAC       | chr14:98783632 + 98783755   |
| T6                             | AGCACCTCTGTCTGCCTCAA                       | CCTTCCCCTGTGCTAGTTC      | chr9:128864132 + 128864273  |
| T7                             | CCTGGAATGTAGGCTGTGTA                       | CCCCTCTAGCACCCCAACT      | chr11:64339669 + 64339802   |
| T8                             | CCTTCTCCATCTGTGCTGCT                       | CTGTGAGCCCTTCAAATTGC     | chr13:112428887 + 112429038 |
| Isolated origins               |                                            |                          |                             |
| T9                             | TCGTGGCGTCATTCTGTGTA                       | CTTAAAGACGTGCTCCACTGC    | chrX:153819393 + 153819546  |
| T10                            | AGCGAGATTGGGTGTTTCTAG                      | CAACAGCCCCTGAGCTCTATT    | chr7:89871198 + 89871332    |
| T11                            | AGCGTGCAATGTGAGGAAAC                       | GGAGAGAAGCGAAGCAATGA     | chr7:116557558 + 116557666  |
| T12                            | GGGAAGGAAATGCAAGACAA                       | AATTTGGCTGCTTAGCATGG     | chr7:126268071 + 126268212  |
| ENCODE regions without origins |                                            |                          |                             |
| T13                            | CCTCATTGTAGAAGTATGTCCT                     | GGTGTAATTAAGTCTGAGTGGACT | chr11:5280585—5280735       |
| T14                            | AGAAAAAGGAGCTTCCAGTCG                      | TGTGGGTGCAATGAACTGT      | chr4:118853686 + 118853826  |
| T15                            | AGTGGAACAGCCAGGTGTGA                       | TGATCTTTTCTCGGGGTGTG     | chr10:55415286 + 55415418   |
| T16                            | CTGCCTTGTGAGTGTGAAG                        | CGCTGAGCCAGGATTTATGT     | chr18:59660223 + 59660371   |
| T17                            | ACCACCATCTGGGAAAAAAC                       | GTTGGGAACCTGCCCTTTC      | chr11:116160417 + 116160536 |
| T18                            | CACGCAGACTGTCAAAGAA                        | GGAGAGGGGAAATACTGGA      | chr16:26054593 + 26054749   |
| T19                            | CTGGACAGGAATCCAGGAAA                       | CCTTGATTGGTACCCACACC     | chr16:25955735 + 25955892   |
